# Supplementary material for: Antimicrobial activity of iron-depriving pyoverdines against human opportunistic pathogens
Source: eLife. 2024 Dec 18;13:RP92493. doi: 10.7554/eLife.92493 (PMC11655065; doi:10.7554/eLife.92493)

**Supplementary File 1**

Antimicrobial activity of iron-depriving pyoverdines against human opportunistic pathogens

Vera Vollenweider1, Karoline Rehm2, Clara Chepkirui3, Manuela Pérez-Berlanga1, Magdalini Polymenidou1, Jörn Piel3, Laurent Bigler2, Rolf Kümmerli1

1Department of Quantitative Biomedicine, University of Zurich, Zurich, Switzerland

2Department of Chemistry, University of Zurich, Zurich, Switzerland

3Institute of Microbiology, Eidgenössische Technische Hochschule (ETH) Zurich, Zurich, Switzerland

**Supplementary File 1a**

**Supplementary File 1b**

**Supplementary File 1c**

**Supplementary File 1d**

**Supplementary File 1e**


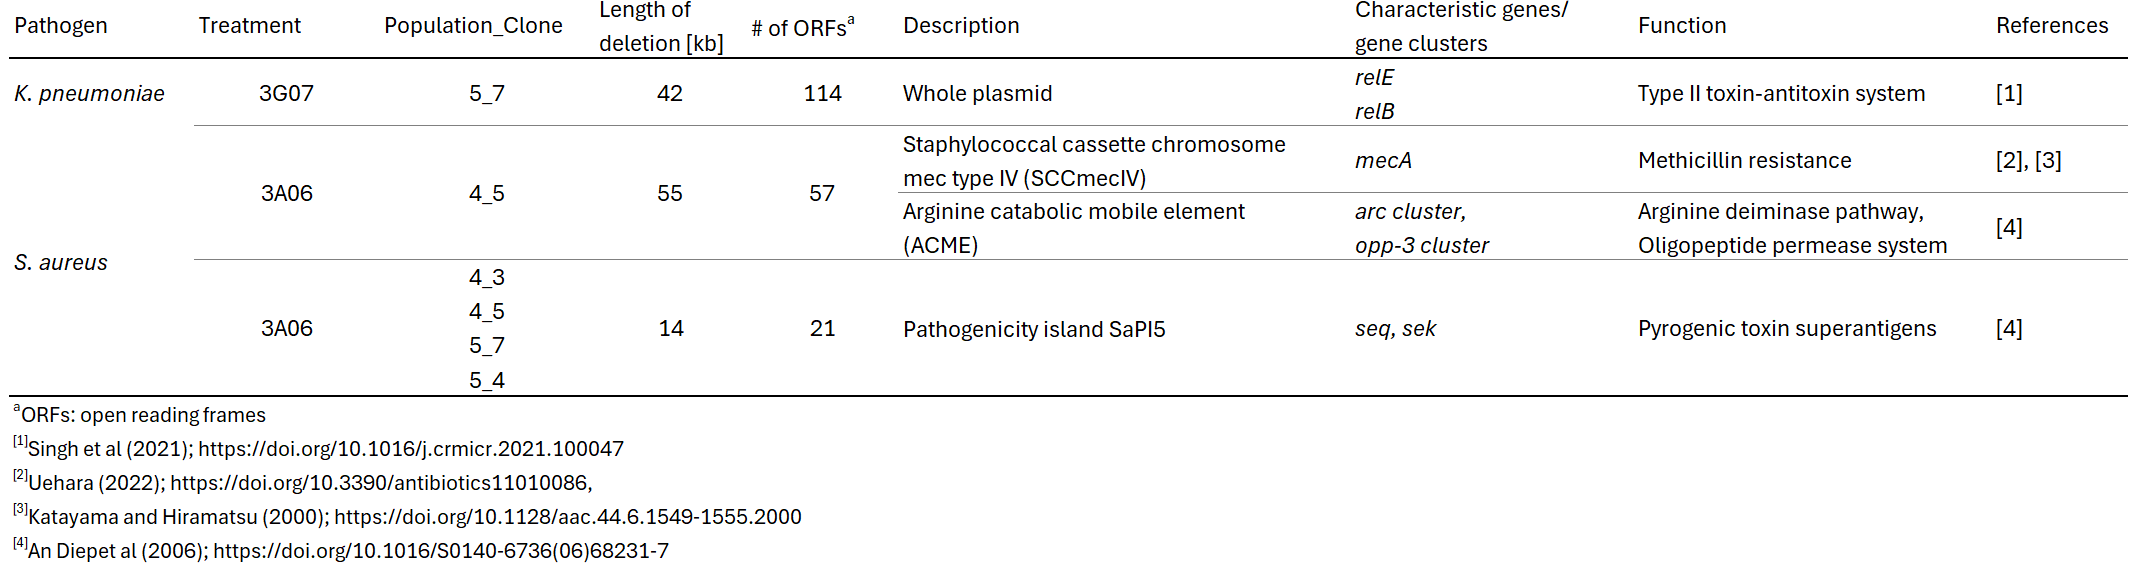

Supplement: Supplementary file 1. [file elife-92493-supp1.docx]
